# Supplementary material
Source: Royal Society of Chemistry journal article supplement (doi:10.1039/d6lp00048g)
Supplement: d6lp00048g1.pdf [file d6lp00048g1.pdf]

## Supplementary Information

# Tailored Imprinted Polymers for Selective Recognition of Sulfonated Dyes: Extraction from Soft Drink, Water and Food Samples

*Krushna Shinde<sup>‡a</sup>, Rupali Thorave<sup>\*‡a</sup>, and Sudhirkumar Shinde<sup>\*a</sup>*

School of Consciousness, Dr Vishwanath Karad MIT World Peace University Kothrud 411038

Pune India

## **EXPERIMENTALS**

### **Materials and Methods**

#### **Commercial Drinks**

Ingredients of commercial drinks are as follows. **CD1**: carbonated water, sugar, acidity regulator, caffeine (29 mg/100 ml), allura red AC (E129) color, stabilizer, preservative, artificial sweetener, vitamins and artificial strawberry flavoring substances; **CD2**: carbonated water, sugar, acidity regulator, sunset yellow FCF (E110), stabilizer, preservative and flavors; **CD3**: carbonated water, sugar, acidity regulator, caffeine (13 mg /100 g), tartrazine (E102), stabilizer, preservative, and flavors; **CD4**: water, sugar, orange juice (10.5%) (reconstituted from orange juice concentrate and orange pulp cells), acidity regulators, antioxidant, tartrazine (E102) and sunset yellow FCF (E110), orange flavors; **CD5**: water, sugar, concentrate mango pulp (5.1%), acidity regulator, stabilizers, preservative, sweetener, antioxidant, sunset yellow FCF (E110), artificial flavors.

#### **HPLC Instrumentation**

Chromatographic analyses were performed using high-performance liquid chromatography (Agilent Infinity 1260 II HPLC) system equipped with a quaternary solvent delivery module, autosampler, column thermostat, and diode array (DAD) detector. Data collection and processing were carried out using instrument-supplied chromatography software (OpenLab CDS).

#### **ATR-FTIR Spectral Analysis Method**

The Fourier transform infrared (FTIR) spectra were recorded using a Tensor-37 ATR-FTIR spectrometer (Bruker) equipped with a platinum attenuated total reflectance (ATR) crystal. All spectra were collected in transmittance mode over the wavenumber range of 4000–500 cm<sup>-1</sup>, at a spectral resolution of 4 cm<sup>-1</sup>, with 24 scans. Background correction, atmospheric compensation, and baseline correction were applied to the spectra. Data acquisition and spectral analysis were performed using OPUS software. The polymers were dried for 3 h in the oven at 50°C before analysis.

**Binding tests using imprinted and nonimprinted polymers:**

In a 1.5 mL microcentrifuge tube, 10 mg of (P1, P2, RP1 and P<sub>N</sub>1, P<sub>N</sub>2, RP<sub>N</sub>2) polymers were separately mixed with 0 to 3 mM of TBA PSA or PSA. The analytes were mixed in 1 mL of the respective solvents or mixture of solvents. The polymer was suspended in the rebinding solvents and shaken for 100 minutes, unless otherwise specified. Next, the vials were centrifuged at 10000 rpm, and the supernatants were analyzed by C18-HPLC-UV analysis. From the supernatant solution, the unbound concentration of analytes was calculated. In the case of MeCN as a rebinding solvent, 600 µL supernatant solution was evaporated to dryness, redissolved in 600 µL distilled water, and further used for quantification of PSA in LC analysis.

The specific amount of analyte bound by the polymer particles (B) was determined by the following formula:

$$B = (C_0 - C) \times v/m \dots \dots \dots (S1)$$

where C<sub>0</sub> is the initial solute concentration, C is the final free solute concentration in the supernatant, v is the total volume of the adsorption mixture, and m is the mass of polymer in each vial.

Binding curves were constructed by plotting B against free concentration C and were subsequently fitted by non-linear regression in the Graphpad Prism 7 curve fitting software to a Langmuir mono-site model:

$$B = B_{\max} \cdot c / (K_d + c) \dots \dots \dots (S2)$$

where  $B_{\max}$  is the maximum amount of solute bound by the polymer particles at saturation. The association constants  $K_a$  was calculated as the inverse of the dissociation constants ( $K_d$ ).

C-18 HPLC-UV method: Reversed phase HPLC detection of unbound analytes: Chromatographic analysis was carried out with an HPLC 1260 Infinity II instrument (Agilent) equipped with a quaternary pump auto-injector and DAD detector. The analytical column was a C18 reversed phase Agilent (150 mm x 4.6 (i.d.) mm), particle size: 5  $\mu\text{m}$ . The mobile phase consisted of methanol/water (0.1 % TFA): 20/80 (v/v) for PSA. The flow rate was 0.7 mL  $\text{min}^{-1}$  and the injection volume was 10  $\mu\text{L}$ . The column was kept at room temperature. Absorbance wavelength for PSA was 205 nm. For quantification purposes, calibration standards were made using the same solvent as used in the binding experiments. The calibration curve comprised the 0-3 mM concentration range and was recorded after the incubation of the anions. The retention times of PSA were 3.1 min.

### **SY Dye Binding**

5 mg of P2 and P<sub>N</sub>2 particles were suspended in 4 ml of water with 0.1 mM sunset yellow FCF (E110) dye for 15 min, then centrifuged at 10000 rpm for 5 min. The particles were washed sequentially with 1 mL of 0.1N HCl, 1 ml of 90:10 MeOH: 25% NH<sub>3</sub> (twice), 1 mL of 80:20 Methanol: 0.1 N HCl, and 1 mL of 100% methanol. After drying, optical and fluorescent images were captured using a Carl Zeiss Axio observer A1 fluorescent microscope with a red excitation

filter at 700 ms exposure. The first three washing fractions were collected and analyzed using a C18-HPLC-UV method. The analytical method and parameters were adopted from the same procedure used for the analysis of the dye mixture.

### **Rebinding isotherm for TZ dye**

Specifically, 2.5 mg of both P2 and PN2 polymers were suspended in 1 mL of TZ dye solutions ranging from 0 to 2 mM, and agitated gently for 100 min. Subsequently, the polymer particles were separated via centrifugation at 10000 rpm. The supernatant was then analyzed directly using a multiplate reader, with spectral scanning performed from 300 nm to 700 nm. The rebinding isotherm was plotted by quantification of TZ dye at 430 nm utilizing an external calibration curve.

### **Dye Binding experiments with P2 and P<sub>N</sub>2 polymers**

The binding affinity of polymers P2 and P<sub>N</sub>2 for dyes (1-10) was evaluated through rebinding assays. Dye stock solutions were prepared in milli-Q water, with TZ, AR, and MY at 1 mM, and SY, FG, AM, BO, IC, and MO at 0.1 mM. For each dye, 5 mg of polymer (P2 and P<sub>N</sub>2) was suspended in 4 mL of the respective dye solution and agitated for 15 min to allow binding, followed by polymer settling. Supernatant solutions were analyzed using a multiplate reader (BioTek Synergy H1) from 230 to 900 nm, using dye stock solutions as references to quantify dye bound to the polymer by recording absorbance values at dye-specific wavelengths. Finally, dye-bound P2 polymers were dried under vacuum and photographed to visually document the dye binding process. After the rebinding experiment, SY dye-absorbed particles (P2 and P<sub>N</sub>2) were washed sequentially with 1 ml of 0.1 N HCl, twice with a 90:10 methanol:25% ammonia solution, and

then with a 20:80 mixture of 0.1 N HCl: methanol, each wash including 10 min of stirring, centrifugation, and supernatant decanting. The particles were then washed with methanol, dried thoroughly, and imaged using a Carl Zeiss fluorescent microscope (model: Axio Observer A1) with a red excitation filter and a 700 ms exposure time.

### **Evaluation of commercial soft drink by P2, P<sub>N</sub>2**

The binding affinity of polymers P2 and P<sub>N</sub>2 for several commercial soft drinks (CD1 to CD5) was evaluated using rebinding assays. The soft drinks were sourced from the local market. CD1, CD2, and CD3 were carbonated drinks containing Allura Red (AR), Sunset Yellow (SY), and Tartrazine (TZ) dyes, respectively. CD4 and CD5 were juice drinks containing Sunset Yellow (SY) dye. For the carbonated drinks (CD1, CD2, and CD3), 11 mg, 5 mg, and 1 mg of polymer (P2 and P<sub>N</sub>2) were suspended in 4 mL of each drink, respectively. The juice solutions (CD4 and CD5) were first centrifuged to remove pulp, and the supernatant was used for subsequent experiments. 2.5 mg of polymers (P2 and P<sub>N</sub>2) were then suspended in 4 mL of the respective CD4 and CD5 juice solutions. After adding the polymers to the soft drink solutions, the mixtures were agitated for 10–15 minutes to facilitate binding, followed by a 10-minute settling period. Photographs were taken to document the rebinding experiments. The supernatant solutions were then analyzed using a UV-Vis multiplate reader (BioTek Synergy H1) in the 230 to 900 nm range. The original soft drink solutions served as a reference, and absorbance values at dye-specific wavelengths were recorded to quantify the amount of dye bound to the polymers.

### **Dye binding from turmeric samples to the polymers (P2 and P<sub>N</sub>2)**

200 mg of (1-4) turmeric samples were taken in 25 ml conical flasks separately, and 10 mL of milli-Q water was added to them. Shake and sonicate well for 15 min, centrifuge, and then separate the supernatant solution.

In 1.5 mL Eppendorf vials, 1 mL the supernatant solutions of turmeric samples were added to the 2 mg of P2 and P<sub>N</sub>2 polymer. The polymer was shaken for 5 min in shaker, then centrifuge at 9000 rpm for 4 min. The supernatants solution was completely removed from polymer vials. 1st elution: Bound dye to the polymer was removed by washing with number of consequential washing solvents with sonication for 15 min. The solvents were used as follows: 500 µL of MeOH:acetic acid (70:30) x 4 times; 500 µL 45:45:10 (MeOH:1 mM NaCl solution: 25% ammonia) x 5 times and 500 µL of MeOH:acetic acid (70:30) x 1 times. After each washing, supernatant was collected after centrifugation. The supernatant solutions were collected and evaporated by rotary evaporator, redissolved to 1 mL in milli-Q water. The extraction was quantified further for C18-HPLC-UV analysis. In second elution, the polymers were washed with 500 µL MeOH: acetic acid (70:30) twice with sonication for 15 min. The washing solvent were separated by centrifugation and extracts was evaporated by vacuum oven at 60°C. The bound dye was dissolved in 500 µL of milli-Q water and was used for C18-HPLC-UV analysis.

#### MY C-18 HPLC-UV method

The method for detecting MY dye using Reversed-phase HPLC is similar to that of PSA, with slight modifications. Specifically, the mobile phase consisted of methanol/water (0.1 % TFA) at a ratio of 25/75 (v/v). The flow rate was set to 1.1 mL min<sup>-1</sup>, and the absorbance wavelength for PSA was 430 nm. The retention time for MY was observed to be 7 min.

#### **Molecularly Imprinted Polymer - Solid Phase Extraction (MIP-SPE) of dye mixture from water**

To perform MIP-SPE on dye mixtures in water, 20 mg of P2/P<sub>N</sub>2 polymers were packed into 3 ml cartridges. A 1 L water sample was spiked with a mixture of Tartrazine (TZ), Metanil yellow (MY), Fast green (FG), Alizarin red (AR), and Sunset yellow (SY) dyes (1.5 ml of 0.03 mM of each). This spiked water was passed through the P2/P<sub>N</sub>2 cartridges at a flow rate of 2.5 mL/min under a vacuum of approximately 30 mmHg. After drying the polymers, the adsorbed dyes were eluted in two steps: Elution 1 (E1) used 1 mL of 0.1 N HNO<sub>3</sub>: methanol (80:20), 3 mL of 0.1 N HNO<sub>3</sub>: methanol (60:40), and 2 mL of 0.1 N HNO<sub>3</sub>: methanol (50:50). Elution 2 (E2) used 4 mL of 0.25 N HNO<sub>3</sub>: methanol (50:50). To neutralize the elution, 100 µL of 25% ammonia was added to E1 and 280 µL to E2. For HPLC analysis, 500 µL of the combined elution fractions were mixed with 500 µL of milli-Q water.

#### **HPLC method for separation of Dye mixture**

Separations were conducted on a reversed-phase Agilent ZORBAX Eclipse Plus C18 column (150 mm × 4.6 mm i.d., 5 µm particle size). The column temperature was maintained at room temperature during analysis. The mobile phase consisted of two eluents: eluent A, water containing 0.1% (v/v) trifluoroacetic acid, and eluent B, methanol containing 0.1% (v/v) trifluoroacetic acid. The flow rate was set to 1.1 mL min<sup>-1</sup>, and the system pressure was limited to a maximum of 400 bar. The total analysis time for each run was 15 min. A gradient elution strategy was applied to achieve efficient separation. The initial mobile phase composition was 75% A and 25% B and was held for 3 min. The proportion of eluent B was increased to 70% at 4 min and further raised to 100% at 6 min. At 10.2 min, the composition was adjusted to 85% B and 15% A. Finally, the mobile phase was returned to 75% B and 25% A at 15 min to allow column

re-equilibration before subsequent injections. Detection was carried out using a diode array detector. Chromatograms were recorded at 430nm wavelength.

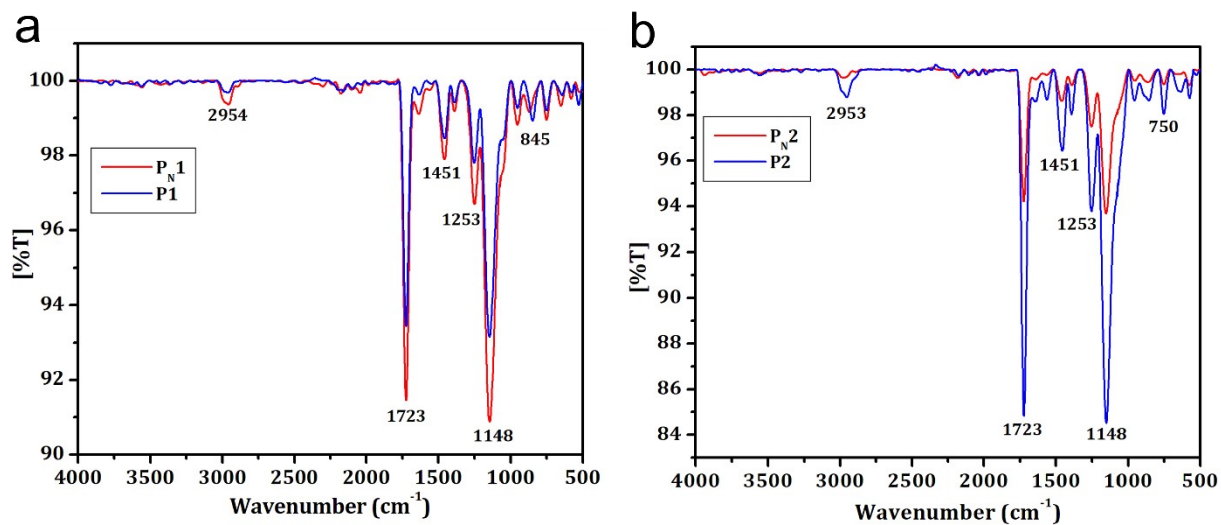

**Figure S1.** Overlay ATR-IR spectra of a) P1/P<sub>N</sub>1, b) P2/P<sub>N</sub>2. MIP and NIP spectra are in blue and red colored respectively.

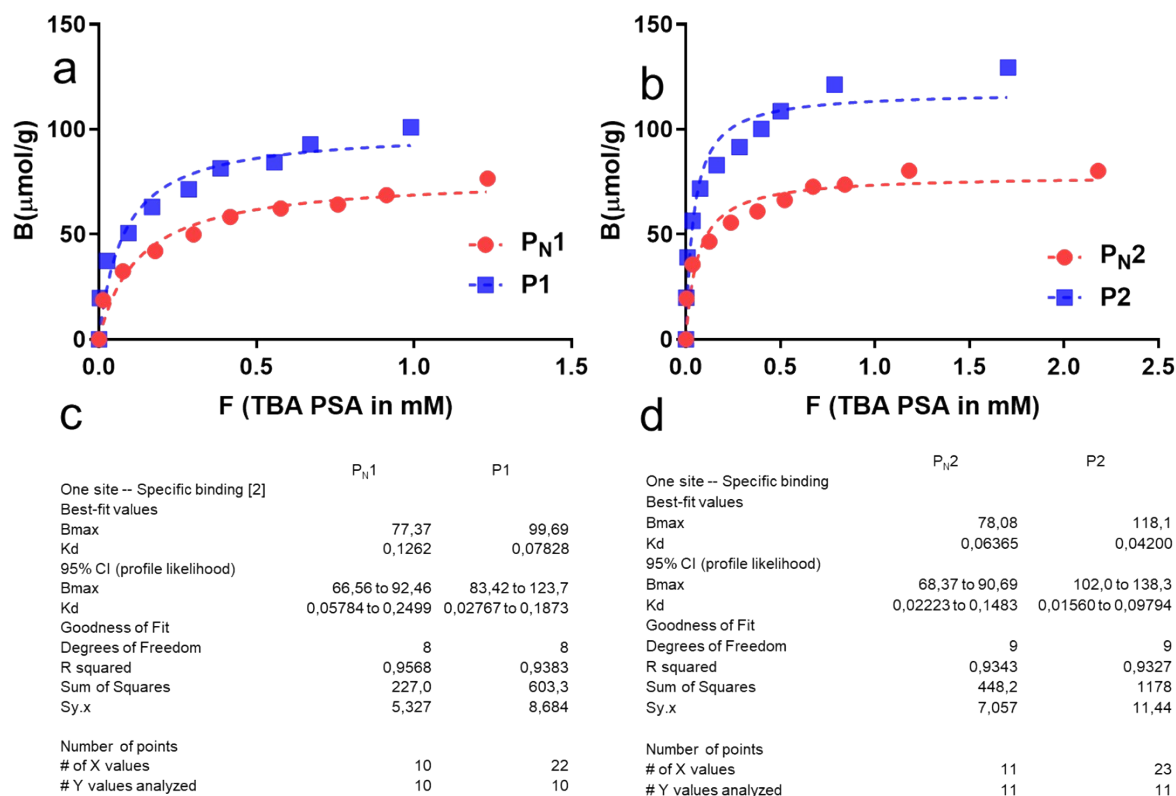

**Figure S2.** Equilibrium binding isotherms for the uptake of the phenyl sulfonic acid tetrabutylammonium (TBA PSA) by (a) P1, P<sub>N1</sub> and (b) P2 P<sub>N2</sub> (right) in 100% MeCN. F = concentration of the free TBA PSA (in mM), B = specific amount of bound TBA PSA ( $\mu\text{mol g}^{-1}$ ). (c, d) The binding constants (K<sub>a</sub>) and specific binding capacities (B<sub>max</sub>) were obtained from by non-linear curve fitting of the data assuming a Langmuir monosite binding model.

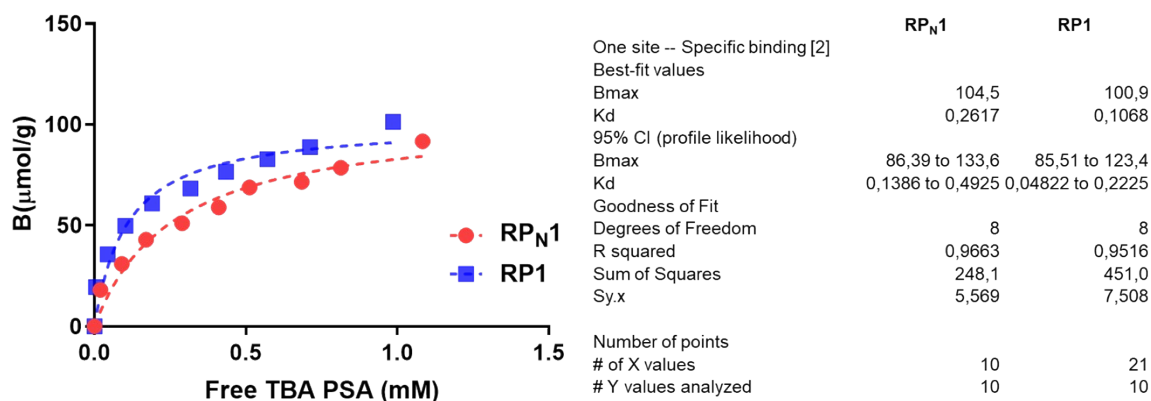

**Figure S3.** Equilibrium binding isotherms for the uptake of the phenyl sulfonic acid tetrabutylammonium (TBA PSA) by RP1, RP<sub>N</sub>1 in 100% MeCN. F = concentration of the free TBA PSA (in mM), B = specific amount of bound TBA PSA ( $\mu\text{mol g}^{-1}$ ). The binding constants ( $K_a$ ) RP1 =  $9.36 \times 10^3 \text{ M}^{-1}$ ; RP<sub>N</sub>1 =  $3.82 \times 10^3 \text{ M}^{-1}$  and specific binding capacities ( $B_{\text{max}}$ ) RP1 =  $100.9 \pm 18.95 \mu\text{mol g}^{-1}$ , RP<sub>N</sub>1 =  $104.5 \pm 23.61 \mu\text{mol g}^{-1}$  were obtained from by non-linear curve fitting of the data assuming a Langmuir monosite binding model. RP1 and RP<sub>N</sub>1 polymers previously reported share an identical composition, differing only an initiator as AIBN and polymerized at 65°C.<sup>1</sup>

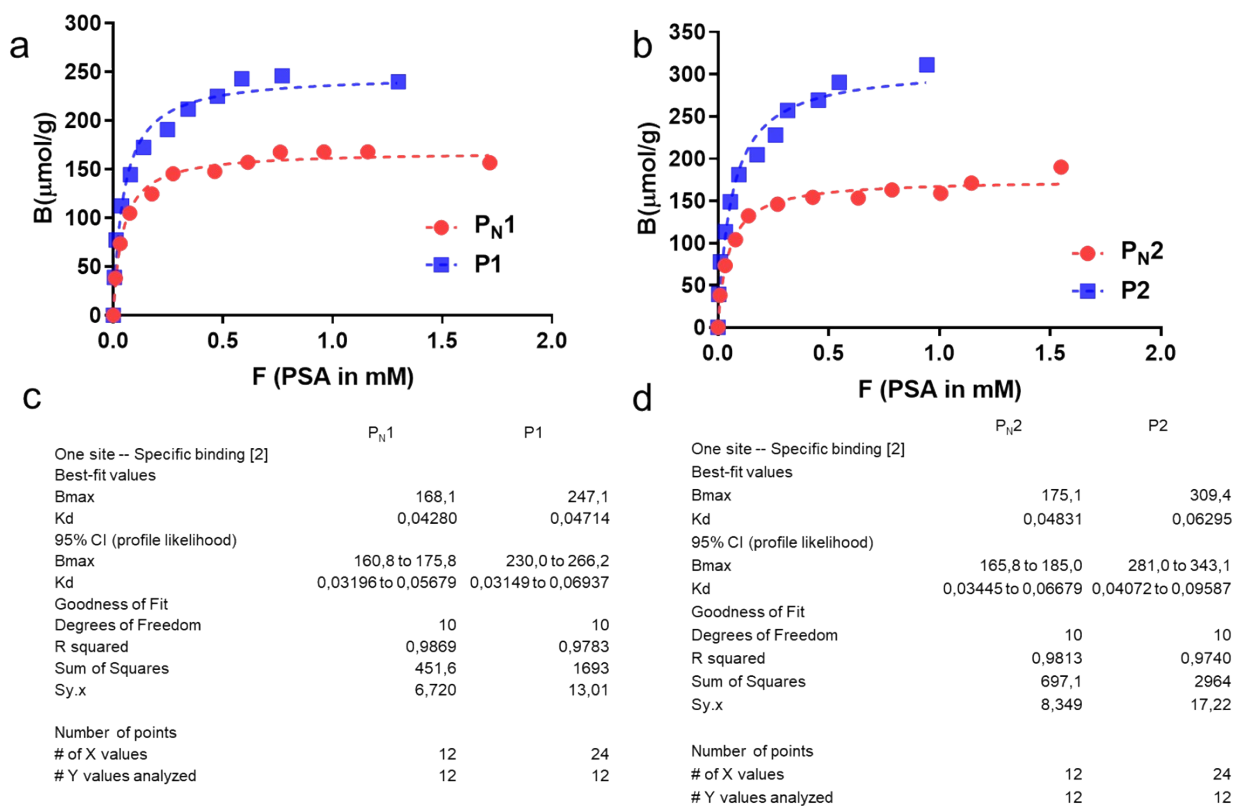

**Figure S4.** Equilibrium binding isotherms for the uptake of the PSA by (a) P1, P<sub>N</sub>1 and (b) P2, P<sub>N</sub>2 (right) in 100% water. F = concentration of the free PSA (mM), B = specific amount of bound PSA ( $\mu\text{mol g}^{-1}$ ). (c, d) The binding constants ( $K_a$ ) and specific binding capacities ( $B_{\text{max}}$ ) were obtained from by non-linear curve fitting of the data assuming a Langmuir monosite binding model.

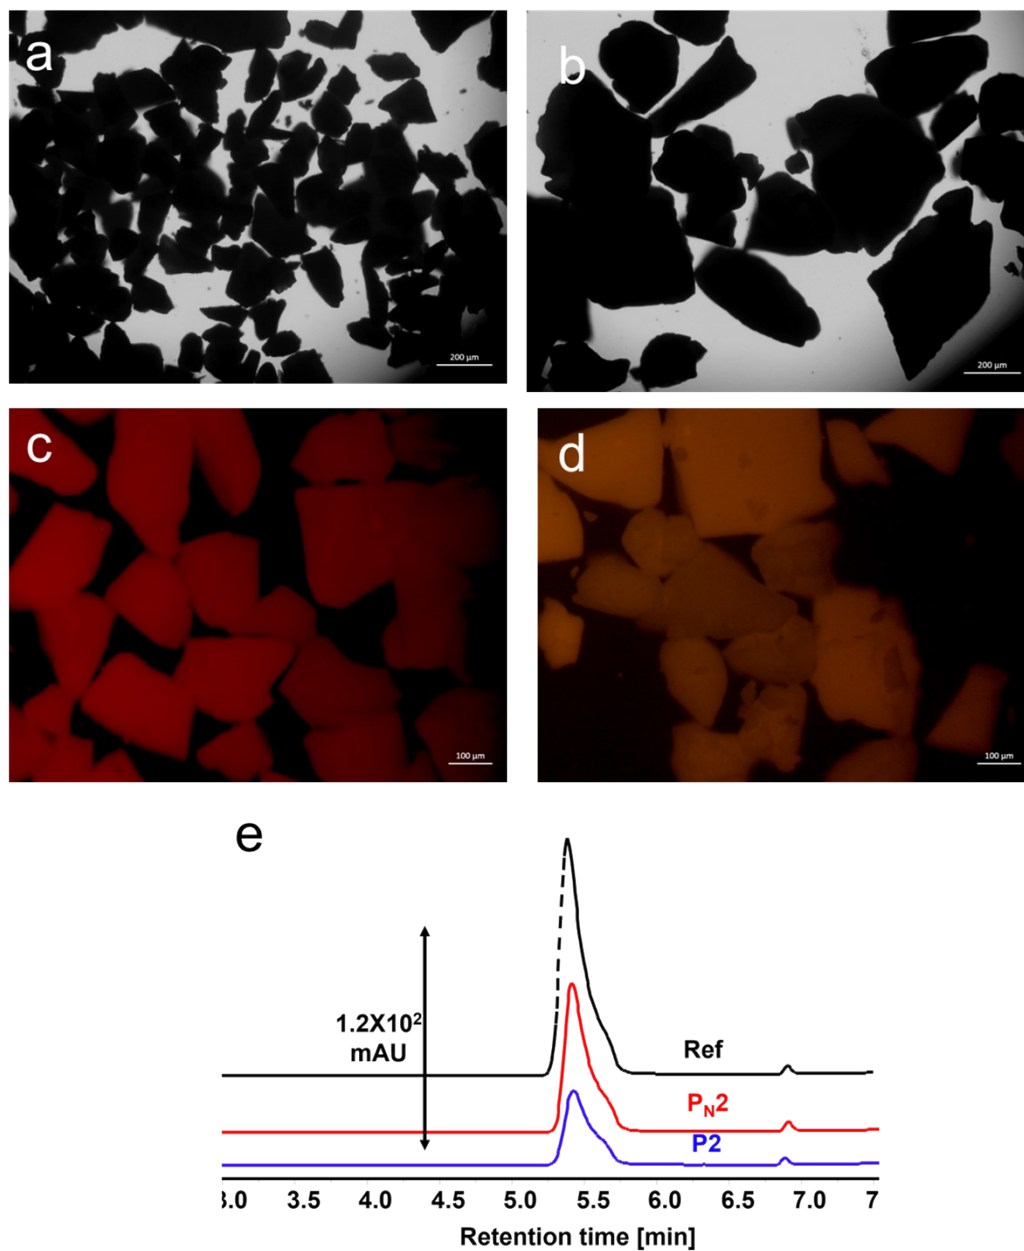

**Figure S5.** Optical microscope images of P2 (a), P<sub>N</sub>2 (b); Fluorescence images of bound sunset yellow dye to P2 (c) and P<sub>N</sub>2 (d) particles after washing with acidic and basic solvents. Fluorescent images were captured using a Carl Zeiss Axio observer A1 fluorescent microscope with a red excitation filter at 700 ms exposure. (e) C18-HPLC-UV chromatograms of the collected washing fractions of SY obtained from P2/P<sub>N</sub>2 polymers.

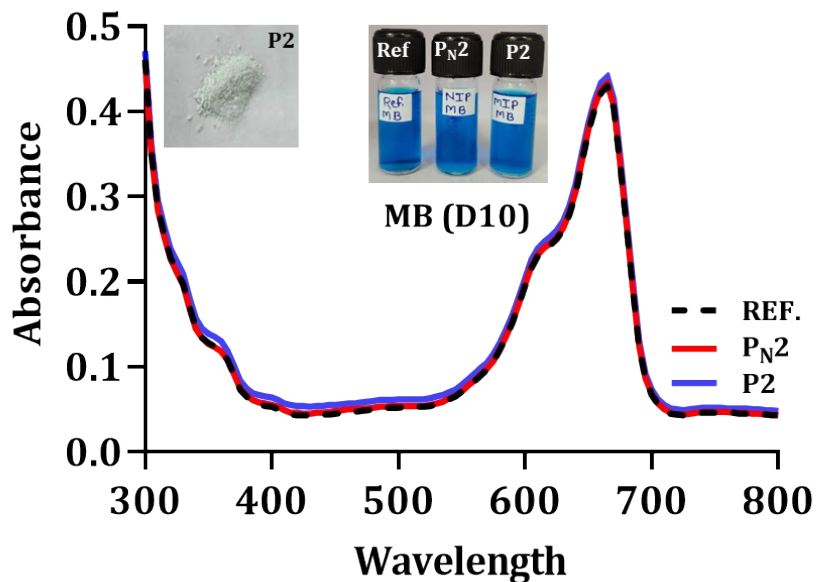

**Figure S6.** Binding of Methylene Blue (MB) dyes containing sulfonate moiety by P2, P<sub>N</sub>2 in 100% water. Absorption spectra of MB, after binding by P2, P<sub>N</sub>2 in comparison to reference dye solutions. Inset: In glass vials, photographs of MB dye binding experiment after 20 min and polymers with respective MB capture by P2 polymers.

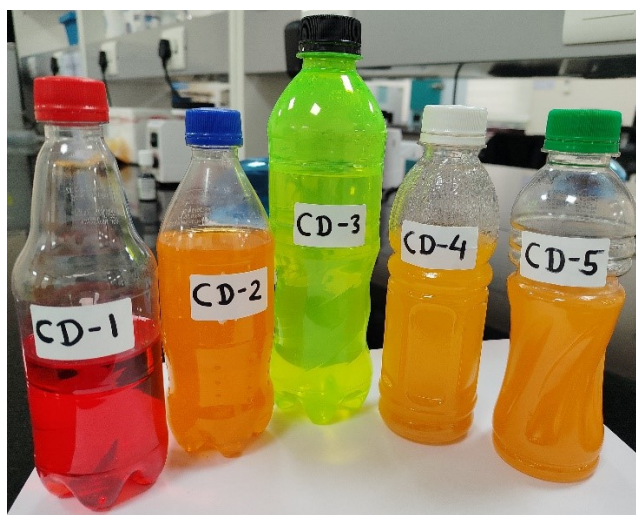

**Figure S7.** Commercial soft drinks (CD1- CD5) were utilized for binding experiments. The sulfonated dyes from CD1 to CD5 were extracted using imprinted polymer P2/P<sub>N</sub>2.

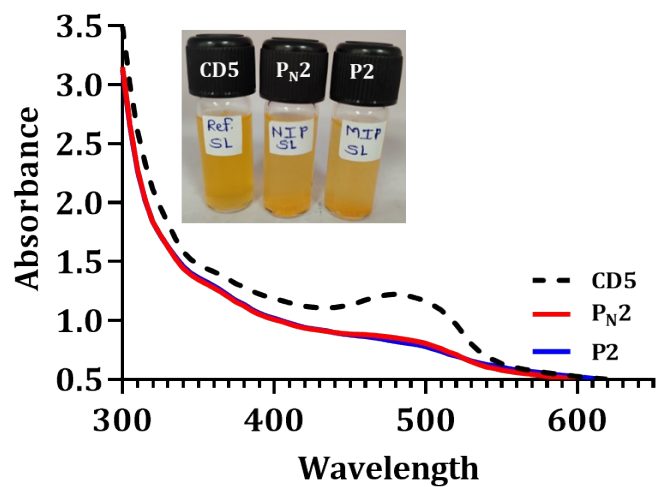

**Figure S8.** Binding of sulfonate dye by P2, P<sub>N</sub>2 in soft drink CD5. Absorption spectra of CD5, after binding by P2, PN2 in comparison to CD5. Inset: In glass vials, photographs of dye binding

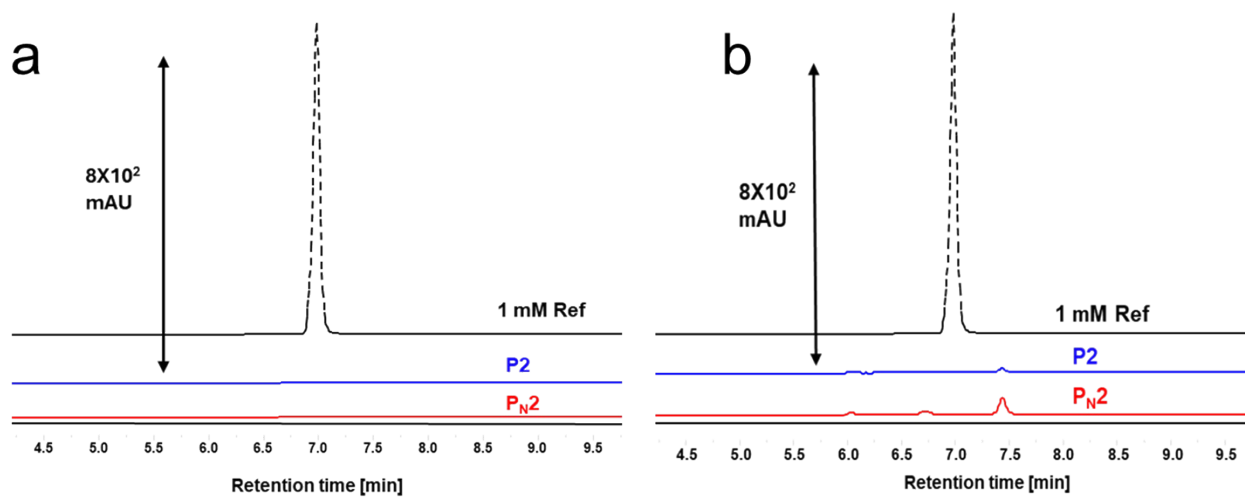

**Figure S9.** Overlay spectra of C18-HPLC-UV of eluted fractions of dyes from turmeric sample

4. a) Elution fraction – 1, b) elution fraction – 2.

experiment after 20 min.

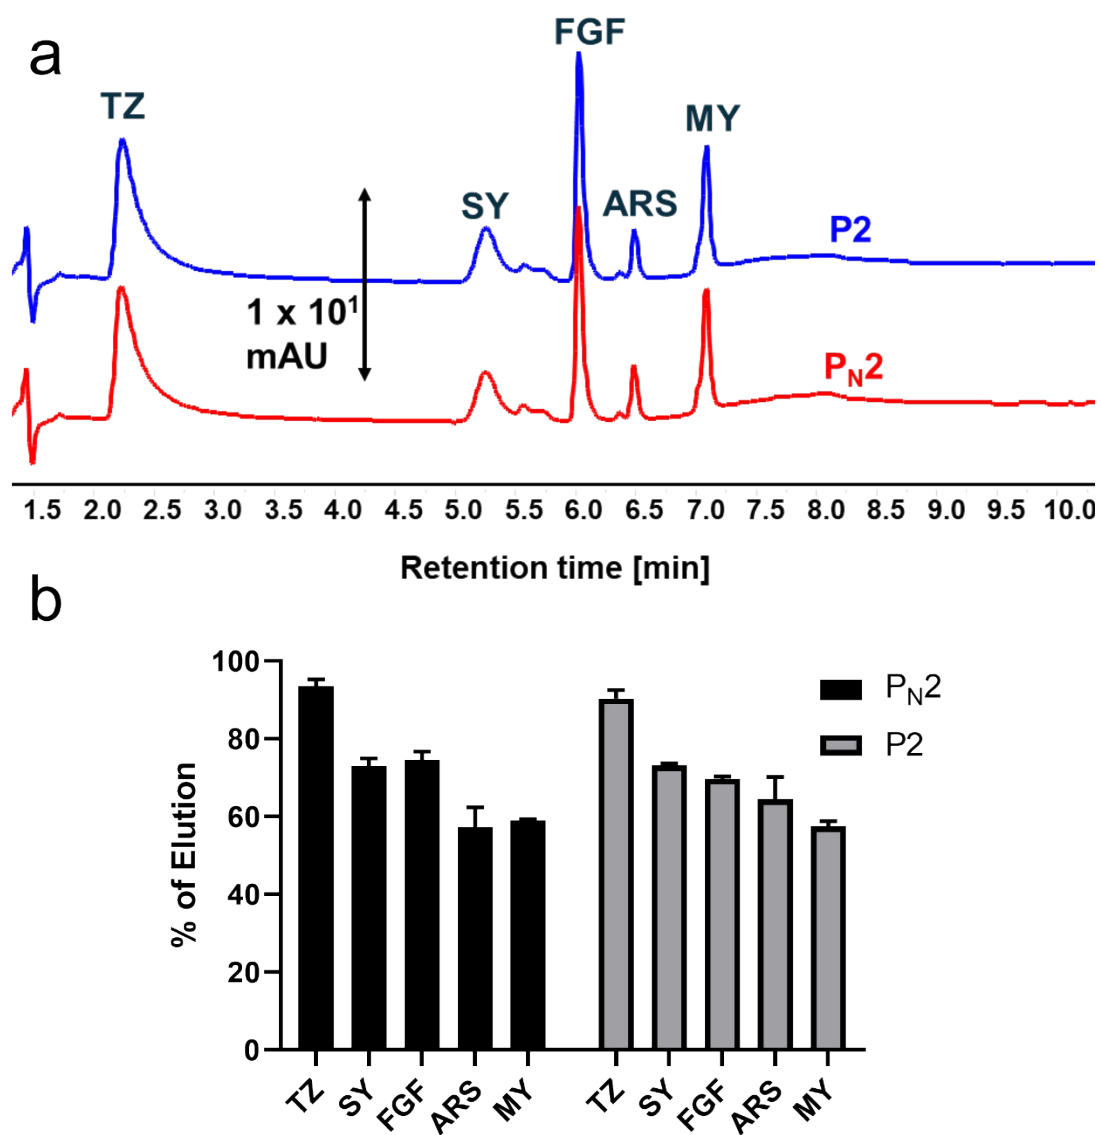

**Figure S10.** MIP-SPE experiments of mixture of dyes spiked in from water. (a) Overlay spectra of C18-HPLC-UV of combined eluted fractions (E1+E2) of mixture of dyes, (b) % of eluted dyes from P2/P<sub>N2</sub> polymers.

**Table S1:** Examples of sulfonated dyes imprinted polymer using sulfonated dyes as a template and their polymer compositions and reported applications.

| Sr. No. | Template                  | Polymer Compositions                                                                 | Polymer format                         | Applications                                                                                                                  | Ref |
|---------|---------------------------|--------------------------------------------------------------------------------------|----------------------------------------|-------------------------------------------------------------------------------------------------------------------------------|-----|
| 1.      | Acid Black 1              | MAA: EGDMA<br>AIBN (Thermal)<br>T:FM:CL/1:10:44                                      | Bulk Format                            | Selective recognition Acid Black 1, Acid Black 210, Acid Brown 703 to MIPs and separation of dyes from environmental samples. | 2   |
|         | Acid Black 210            |                                                                                      |                                        |                                                                                                                               |     |
|         | Acid Brown 703            |                                                                                      |                                        |                                                                                                                               |     |
| 2.      | Acid Green 16 (AG16) dye  | 1-VI: EGDMA (FM:T:CL)/ 0.08: 0.24: 16)<br>AIBN (Thermal)                             | Bulk Format                            | Selective recognition and extraction of AG16 dye in water samples                                                             | 3   |
| 3.      | SY dye                    | SY: DAC: MBA (APS) 35°C (Thermal)                                                    | MIPs grafted @SiO <sub>2</sub>         | Removal of sunset yellow, acid red 14, acid red 18 from water                                                                 | 4   |
| 4       | Cibacorn Red Dye          | MAA: EGDMA, AIBN (Thermal)<br>T:FM:CL/ 2.5/0.8/40                                    | Bulk Format                            | Dyes removed from tap and wastewater                                                                                          | 5   |
| 5       | Acid Violet 19 (AV19) dye | 1-VI: EGDMA (FM: T: CL)/ 0.2: 0.8: 4)<br>AIBN (Thermal)                              | BulkFormat                             | Removal of AV19 from river dye                                                                                                | 6   |
| 6       | SY dye                    | Titanium iso-propoxide [Ti(OiPr) <sub>4</sub> ] gelling by HCl and thermal treatment | Sol-gel process.                       | Selective extraction SY dye from mixture of dyes.                                                                             | 7   |
| 7       | SY dye                    | DMC: EGDMA: AIBN in MeOH: H <sub>2</sub> O (T:FM:CL/ 1:4:10)                         | Polymer NPs                            | Separation of SY from Water                                                                                                   | 8   |
| 8       | Tratarzine                | 1-MA-3MI-Br (T:M/ 1:4)<br>AIBN                                                       | Inverse Emulsions on Mag imprinted NPs | Removal of water-soluble dyes such as TZ, Sunset Yellow, Orange G, Brilliant ponceau 5R, Amarnath from contaminated water     | 9   |
| 9       | Direct Red 23             | AA: EGDMA in DMSO (T:FM.CL /1 :79:371)                                               | Bulk format                            | Dyes removed from wastewater                                                                                                  | 10  |

|    |                |                                                        |                   |                                                                                    |               |
|----|----------------|--------------------------------------------------------|-------------------|------------------------------------------------------------------------------------|---------------|
|    |                | AIBN (Thermal)                                         |                   |                                                                                    |               |
| 10 | Congo Red (CR) | MAA: EGDMA: (AIBN in DMSO + MeCN)<br>T:FM:CL/ 0.1:4:20 | Polymer particles | Removal of Congo red dye from industrial effluents and contaminated natural waters | <sup>11</sup> |

Bulk formats refer to bulk imprinted polymer, and the particles obtained were crushed and sieved.

Following abbreviations are for table as follows:

T: template; FM: functional monomer; CL: Crosslinker; CM: Comonomer. AIBN : 2,2'-Azobisisobutyronitrile; DMSO: Dimethyl Sulfoxide; MeCN: Acetonitrile; MeOH: Methanol; MAA: Methacrylic Acid; EGDMA : Ethylene Glycol Dimethacrylate; mMA: methyl methacrylate; VI: vinyl imidazole, SY Dye: Sunset Yellow Dye; CR Dye: Congo Red; DMC: 2-(Methacryloyloxy)ethyl] trimethylammonium chloride); CR P-4B : Cibacron Red P-4B; CO: Cibacron Orange P-4R; CB: Cibacron Black PSG; DAC: acryloyloxyethyl trimethyl ammonium chloride; AMPS: 3-aminopropyltrimethoxysilane; MBA: N,N'-Methylenebisacrylamide; APS: Ammonium persulphate; 1-MA-3MI-Br: 1-( $\alpha$ -methyl acrylate)-3-methylimidazolium bromide:

**Table S2** Elution and quantifications of MY dyes from turmeric samples using HPLC-UV data

|                | Area (E1) | Area (E2) | mM (E1) | mM (E2) | mg E1 | mg E2 | total mg MY | mg MY /200 mg turmeric | mg MY/ 1 g turmeric |
|----------------|-----------|-----------|---------|---------|-------|-------|-------------|------------------------|---------------------|
| <b>N2 (S1)</b> | 149.7     | 1355.4    | 0.04    | 0.36    | 0.015 | 0.07  | 0.08        | 0.82                   | 4.12                |
| <b>M2 (S1)</b> | 96.8      | 3313.4    | 0.03    | 0.88    | 0.010 | 0.17  | 0.17        | 1.75                   | <b>8.73</b>         |
| <b>N2 (S2)</b> | 73.4      | 2007.1    | 0.02    | 0.53    | 0.007 | 0.10  | 0.11        | 1.07                   | 5.36                |
| <b>M2 (S2)</b> | 107.6     | 2537.6    | 0.03    | 0.67    | 0.011 | 0.13  | 0.14        | 1.37                   | <b>6.85</b>         |
| <b>N2 (S3)</b> | 11.8      | 295.7     | 0.00    | 0.08    | 0.001 | 0.01  | 0.02        | 0.16                   | 0.80                |

|                    |      |       |      |      |       |      |      |      |             |
|--------------------|------|-------|------|------|-------|------|------|------|-------------|
| <b>M2<br/>(S3)</b> | 11.4 | 276.3 | 0.00 | 0.07 | 0.001 | 0.01 | 0.01 | 0.15 | <b>0.75</b> |
| <b>N2<br/>(S4)</b> | -    | -     |      |      |       |      |      |      | -           |
| <b>M2<br/>(S4)</b> | -    | -     |      |      |       |      |      |      | -           |

## References

1. Thorave, R.; Celentano, M.; Bankar, K.; Sellergren, B.; Manesiotis, P.; Shinde, S. A., Synthesis of an Imprinted Receptor Targeted for Sulfonated Aromatic Pollutants by a Stoichiometric Substructure Imprinting Approach. *Polym. Sci. Technol.* **2025**, *1* (5), 488-499.
2. Ali, F.; Shah, Z.; Khan, A.; Saadia, M.; AlOthman, Z. A.; Cheong, W. J., Synthesis, column packing and liquid chromatography of molecularly imprinted polymers for the acid black 1, acid black 210, and acid Brown 703 dyes. *RSC Adv.* **2022**, *12* (30), 19611-19623.
3. Foguel, M. V.; Pedro, N. T. B.; Wong, A.; Khan, S.; Zanoni, M. V. B.; Sotomayor, M. d. P. T., Synthesis and evaluation of a molecularly imprinted polymer for selective adsorption and quantification of Acid Green 16 textile dye in water samples. *Talanta* **2017**, *170*, 244-251.
4. Gao, B. Chen, T.; Qiao, Z.; Fang, L., Preparation of Acid Dye Molecule Surface-Imprinted Material for Effective Removal of Acid Dyes from Water and Study on its Molecule Recognition Performance. *Sep. Sci. Technol.* **2015**, *50* (8), 1108-1119.
5. Al-Degs, Y. S.; Abu-Surrah, A. S.; Ibrahim, K. A., Preparation of highly selective solid-phase extractants for Cibacron reactive dyes using molecularly imprinted polymers. *Anal. Bioanal. Chem.* **2009**, *393* (3), 1055-1062.
6. Luna Quinto, M.; Khan, S.; Picasso, G.; Taboada Sotomayor, M. D. P., Synthesis, characterization, and evaluation of a selective molecularly imprinted polymer for quantification of the textile dye acid violet 19 in real water samples. *J. Hazard. Mat.* **2020**, *384*, 121374.
7. Li, M.; Li, R.; Tan, J.; Jiang, Z.-T., Titania-based molecularly imprinted polymer for sulfonic acid dyes prepared by sol-gel method. *Talanta* **2013**, *107*, 203-210.
8. Zhang, Y.; Xie, Z.; Teng, X.; Fan, J., Synthesis of molecularly imprinted polymer nanoparticles for the fast and highly selective adsorption of sunset yellow. *J. Sep. Science.* **2016**, *39* (8), 1559-1566.
9. Luo, X.; Zhan, Y.; Huang, Y.; Yang, L.; Tu, X.; Luo, S., Removal of water-soluble acid dyes from water environment using a novel magnetic molecularly imprinted polymer. *J. Hazard. Mat.* **2011**, *187* (1), 274-282.
10. Okutucu, B.; Hamarat Sanlier, S., Decolorization of textile wastewater by dye-imprinted polymer. *Desalination Water Treat.* **2016**, *57* (45), 21577-21584.
11. Shafqat, S. R.; Bhawani, S. A.; Bakhtiar, S.; Ibrahim, M. N. M., Synthesis of molecularly imprinted polymer for removal of Congo red. *BMC Chem.* **2020**, *14* (1), 27.
